# Supplementary material for: Substituent directed cellular imaging in the 800–850 nm range with BF2-azadipyrromethene fluorophores
Source: Royal Society of Chemistry journal article supplement (doi:10.1039/d2ra07942a), 2023-01-01
Supplement: d2ra07942a1.pdf [file d2ra07942a1.pdf]

Supplementary Information

**Substituent Directed Cellular Imaging in the 800-850 nm range with  
BF<sub>2</sub>-Azadipyrrromethene Fluorophores**

Cathal Caulfield, Dan Wu, Massimiliano Garre and Donal F. O'Shea\*

Department of Chemistry, RCSI, 123 St. Stephen's Green, Dublin 2, Ireland.

## Table of Contents

---

|                                                                                                                                                 |    |
|-------------------------------------------------------------------------------------------------------------------------------------------------|----|
| <b>Fig. S1.</b> Absorbance and fluorescence spectra of <b>11</b> .....                                                                          | 3  |
| <b>Fig. S2.</b> Photophysical characteristics of <b>6</b> in aqueous CTAB and H <sub>2</sub> O .....                                            | 3  |
| <b>Fig. 3.</b> HCl titration of <b>7</b> in water (Fluorescence) .....                                                                          | 4  |
| <b>Table S1.</b> Photophysical characteristics of <b>7</b> , <b>7-H<sup>+</sup></b> and <b>7-2H<sup>+</sup></b> in aqueous HCl.....             | 4  |
| <b>Fig. S4.</b> Absorbance of <b>5</b> , <b>6</b> and <b>7</b> in target microenvironments .....                                                | 4  |
| MDA-MB 231 Cell Imaging                                                                                                                         |    |
| <b>Fig. S5, S6.</b> Repeat MDA-MB 231 CLSM images following incubation with <b>5</b> .....                                                      | 5  |
| <b>Fig. S7.</b> Repeat plasma membrane CLSM images following incubation with <b>6</b> .....                                                     | 6  |
| <b>Fig. S8, S9.</b> CLSM images following 1 and 4 h incubation with <b>6</b> .....                                                              | 7  |
| <b>Fig. S10.</b> Repeat MDA-MB 231 CLSM images following incubation with <b>7</b> .....                                                         | 8  |
| <b>Fig. S11.</b> CLSM images following incubation with <b>11</b> .....                                                                          | 8  |
| NMR and mass spectra for compounds <b>8</b> , <b>9</b> , <b>10</b> , <b>11</b> , <b>5</b> , <b>6</b> , <b>12</b> , <b>13</b> and <b>7</b> ..... | 9  |
| HPLC Traces for compounds <b>11</b> , <b>5</b> , <b>6</b> and <b>7</b> .....                                                                    | 22 |

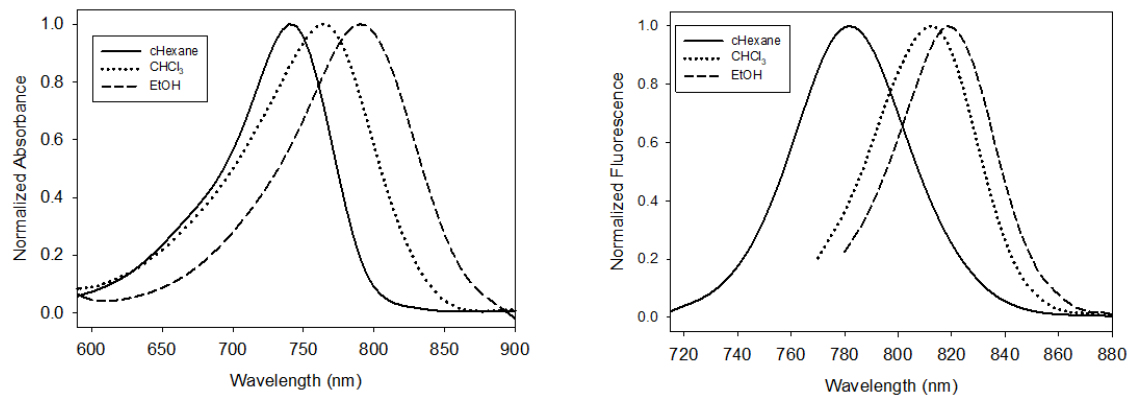

**Fig. S1.** Normalized absorbance and fluorescence spectra of **11** (4  $\mu$ M) in *c*-hexane (solid traces) CHCl<sub>3</sub> (dotted traces) and EtOH (dashed traces).

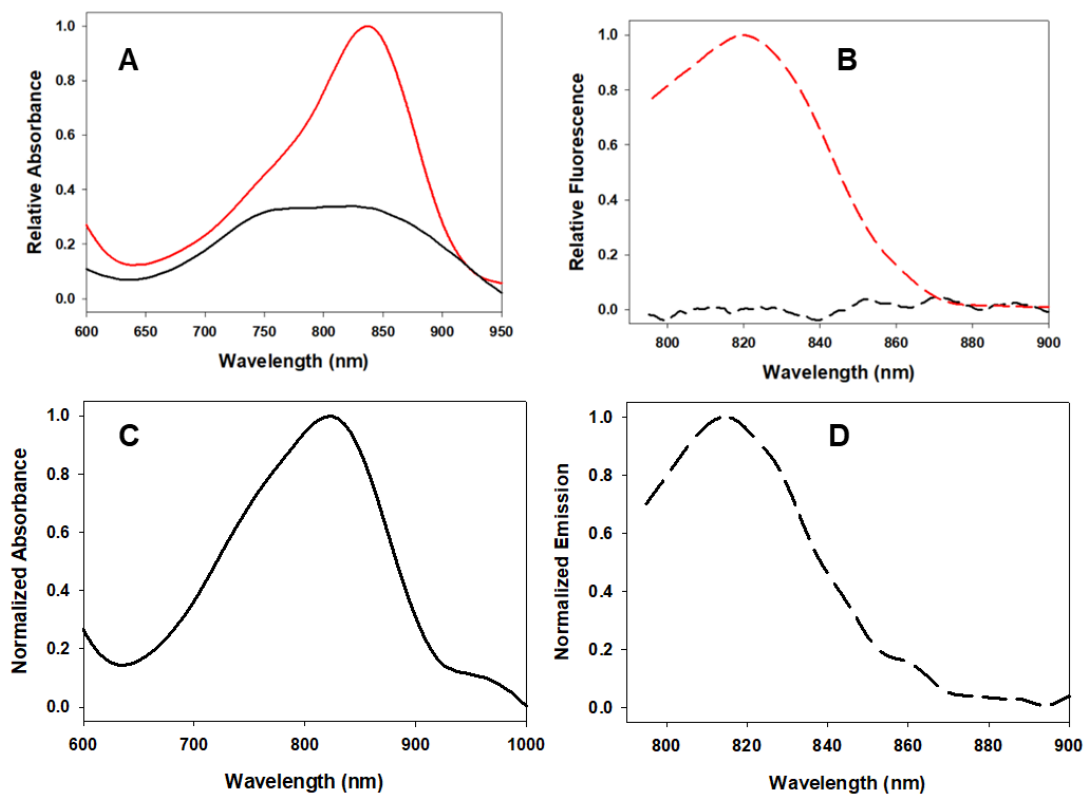

**Fig. S2.** Representative absorbance and emission spectra of **6**. (A) Absorbance and (B) fluorescence in aqueous CTAB (1% w/v; red) and H<sub>2</sub>O (bottom) (4  $\mu$ M; 10 nm slit width). (C) Absorbance and (D) fluorescence spectra recorded in aqueous fetal-calf serum.

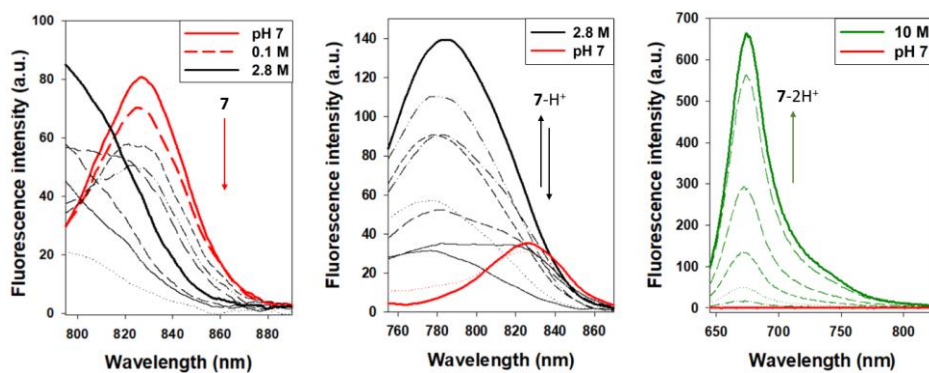

**Fig. S3.** HCl titration of **7** in water (4  $\mu\text{M}$ ). Fluorescence spectra showing  $N$ -protonations of **7** below the pH scale. 10 nm slit widths used for red and black profiles (**7** and **7-H<sup>+</sup>** respectively); 5nm slit widths for green (**7-2H<sup>+</sup>**).

**Table S1.** Photophysical characteristics of **7** and  $N$ -protonated species of **7** in aqueous HCl.

| Entry | Comp.                   | HCl conc. (M)      | $\lambda_{\text{max}}$ abs (nm) | $\lambda_{\text{max}}$ flu (nm) | Excitation (nm) |
|-------|-------------------------|--------------------|---------------------------------|---------------------------------|-----------------|
| 1     | <b>7</b>                | $1 \times 10^{-7}$ | 806                             | 826                             | 780             |
| 2     | <b>7-H<sup>+</sup></b>  | 2.8                | 744                             | 784                             | 740             |
| 3     | <b>7-2H<sup>+</sup></b> | 10                 | 654                             | 675                             | 630             |

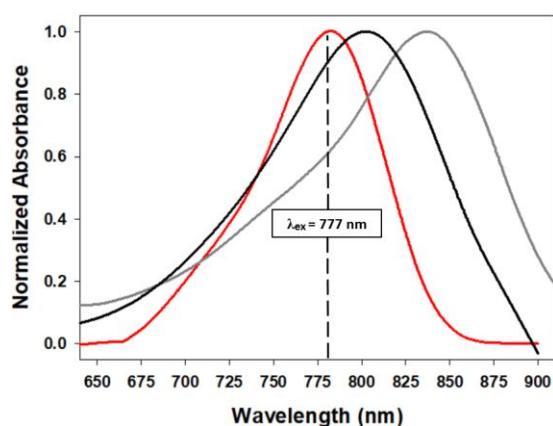

**Fig. S4.** Normalized absorbance spectra of lipophilic **5** in triolein (red), amphiphilic **6** in aq. CTAB (1% w/v; grey) and hydrophilic **7** in  $\text{H}_2\text{O}$  (pH 7; black) with excitation wavelength used for cell imaging highlighted.

## MDA-MB 231 Cell Imaging SI

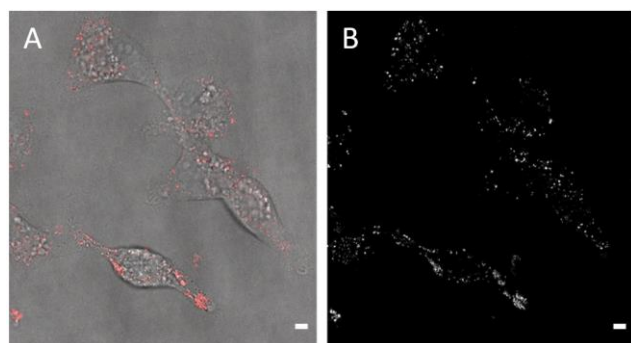

**Fig. S5.** CLSM imaging of MDA MB-231 live cells following 60 min incubation with **5** (5  $\mu\text{M}$ ). (A) CLSM image (fluorescence in red) with bright field overlay. (B) Fluorescence shown in black and white for clarity. Scale bars 5  $\mu\text{m}$ .

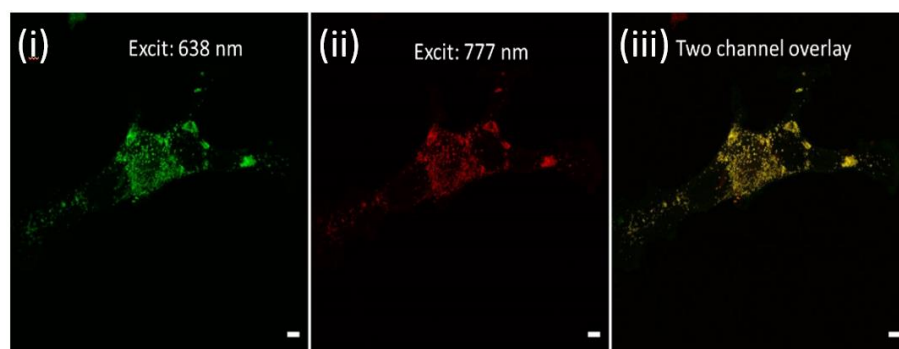

**Fig. S6.** CLSM imaging of MDA MB-231 live cells co-incubated with (i) **1b** and (ii) **5** for 1 h with (iii) showing overlaid images with co-localisation (yellow) of both fluorophores in LDs. Scale bars 5  $\mu\text{m}$ .

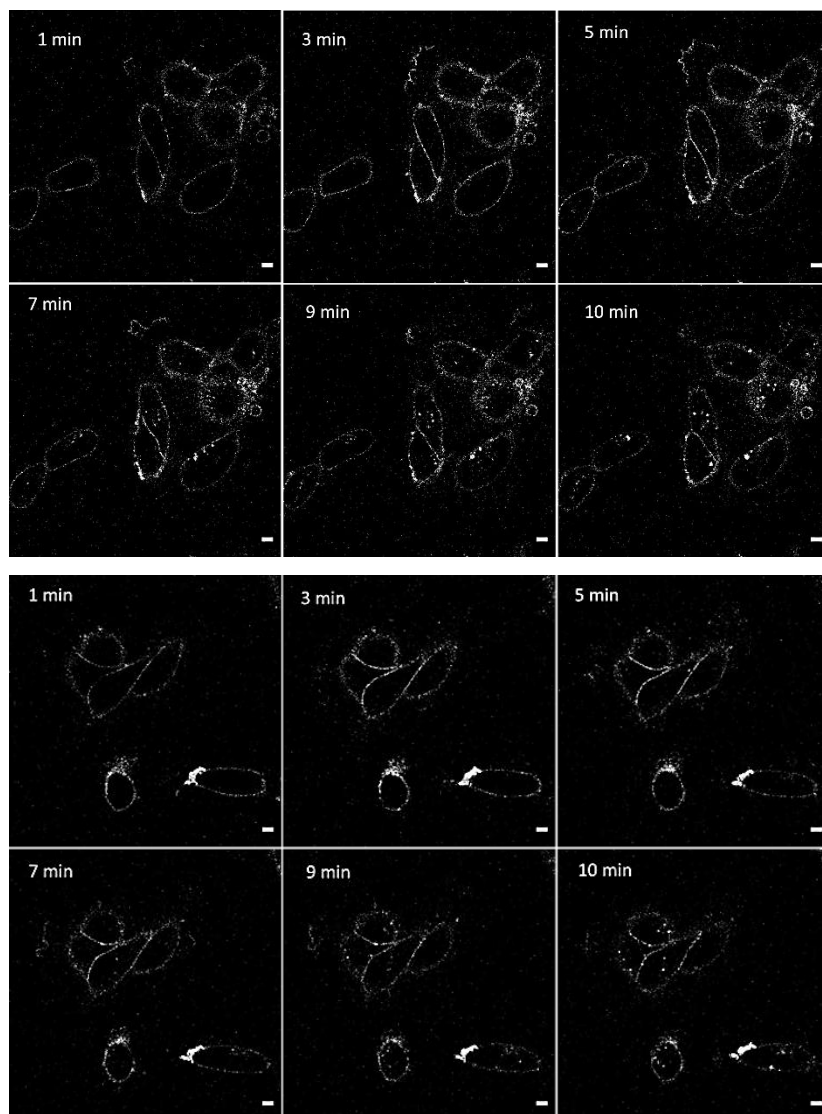

**Fig. S7.** Two representative examples of CLSM imaging of MDA MB-231 live cells over 10 min following incubation with **6** (5 μM). Fluorescence shown in black and white for clarity with time points 1, 3, 5, 7, 9 and 10 min showing increasing visualisation of plasma membranes. Scale bars 5 μm.

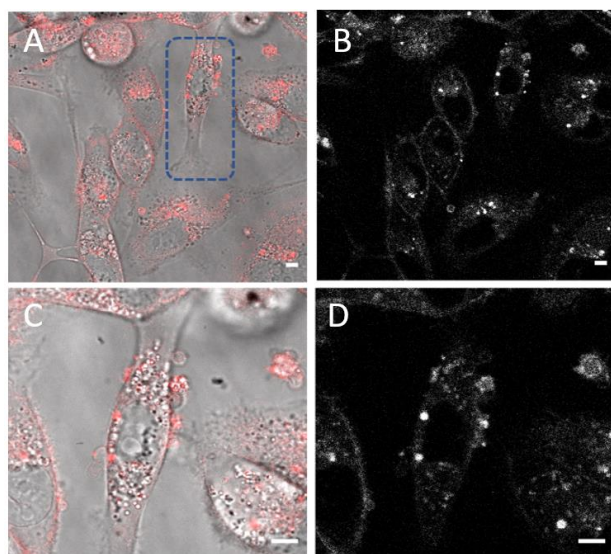

**Fig. S8.** CLSM imaging of MDA MB-231 live cells at 60 min following incubation with **6** (5  $\mu$ M). (A) CLSM image (fluorescence in red) with bright field overlay taken 60 min following the addition of **6**. (B) Fluorescence shown in black and white for clarity. (C) Expansion of image A (fluorescence in red) with bright field overlay. (D) Fluorescence shown in black and white for clarity. Scale bars 5  $\mu$ m.

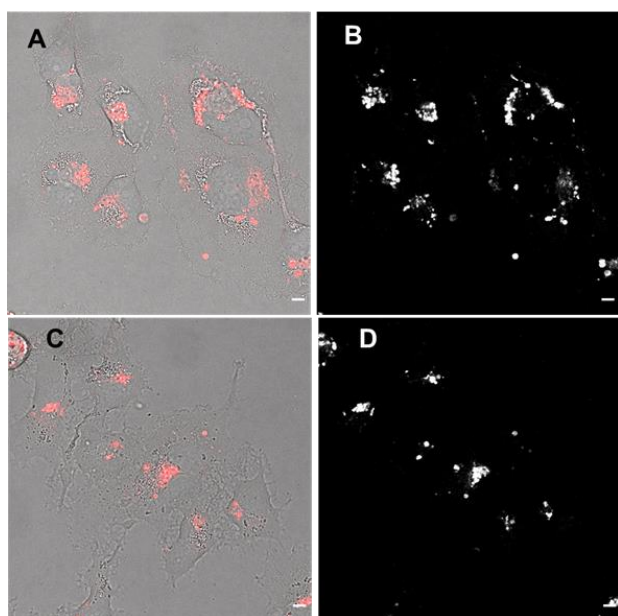

**Fig S9.** Two representative examples of CLSM imaging of MDA MB-231 live cells at 4 h following incubation with **6** (5  $\mu$ M). (A and C) CLSM image (fluorescence in red) with bright field overlay taken 60 min following the addition of **6**. (B and D) Fluorescence shown in black and white for clarity. Scale bars 5  $\mu$ m.

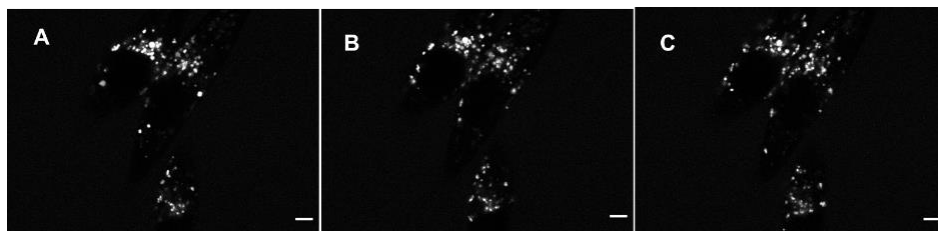

**Fig. S10.** CLSM imaging of MDA MB-231 live cells following 24 h incubation with **7** (5  $\mu$ M). CLSM images from 5 min time lapse showing motion of vesicles with fluorescence shown in black and white for clarity. (A) CLSM image at 0 min. (B) CLSM image at 2.5 min. (C) CLSM image at 5 min. Scale bars 5  $\mu$ m.

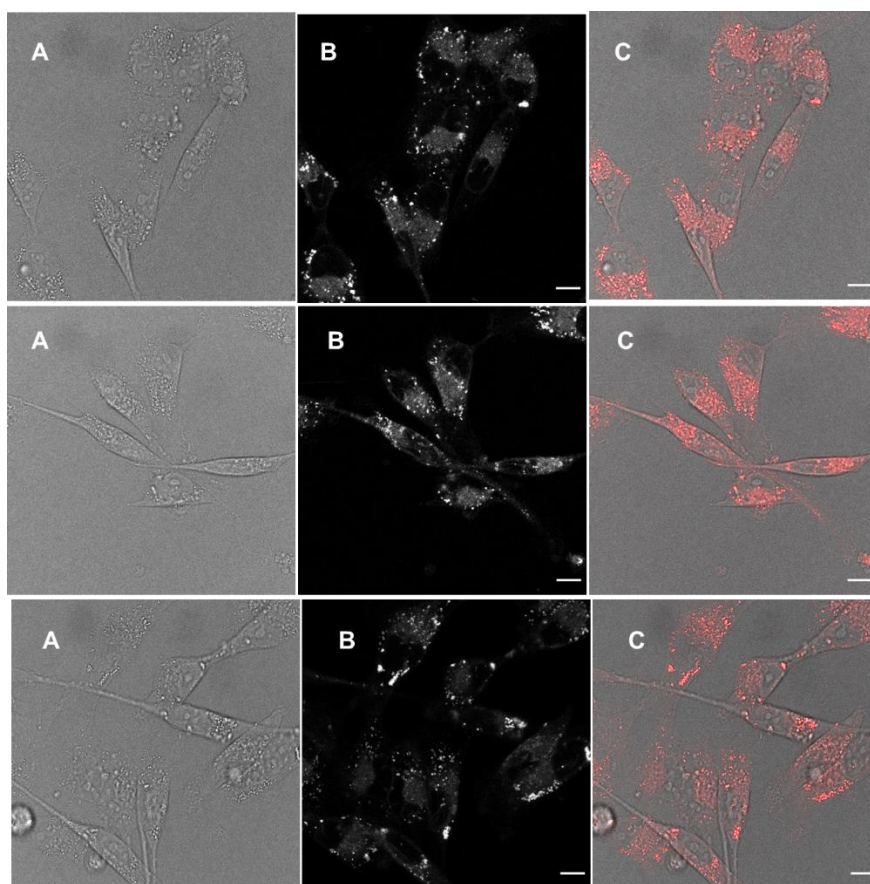

**Fig. S11.** Three representative examples of CLSM imaging of MDA MB-231 live cells following 60 min incubation with **11** (5  $\mu$ M). (A) Brightfield images (B) CLSM images shown in black and white for clarity. (C) CLSM images, fluorescence in red, with bright field overlay. Scale bars 5  $\mu$ m.



NMR and Mass Spec Data for Compounds 8, 9, 10, 11, 5, 6, 12, 13 and 7.

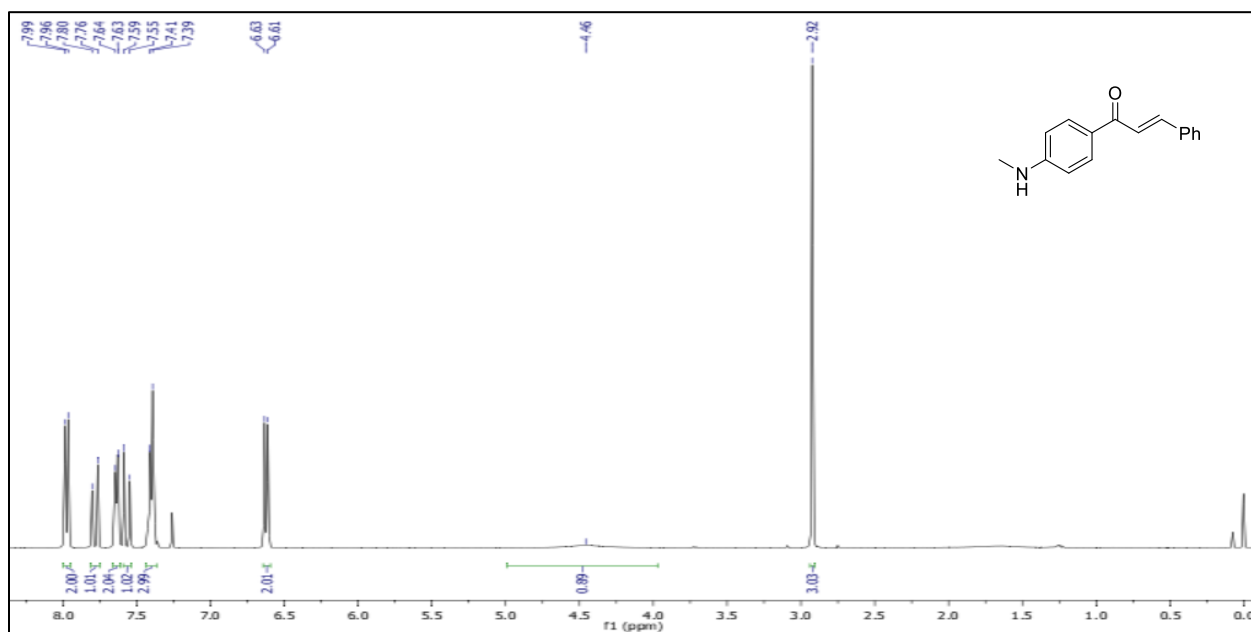

Fig. S12.  $^1\text{H}$  NMR ( $\text{CDCl}_3$ ) spectrum for (8).

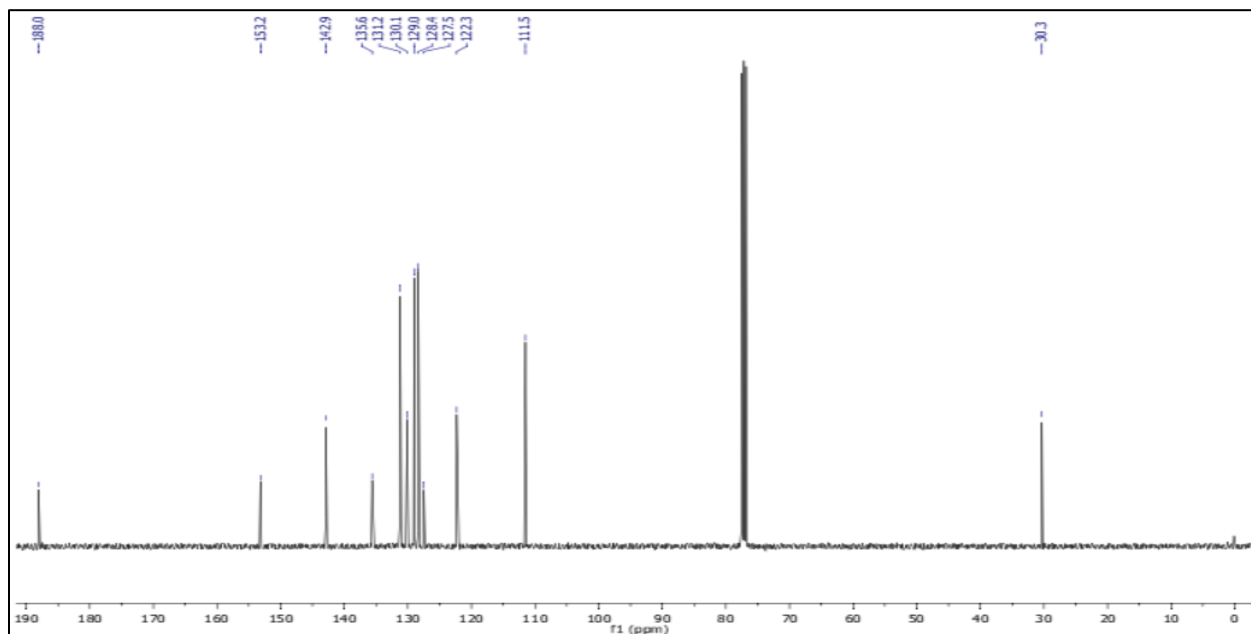

Fig. S13.  $^{13}\text{C}$  NMR ( $\text{CDCl}_3$ ) spectrum for (8).

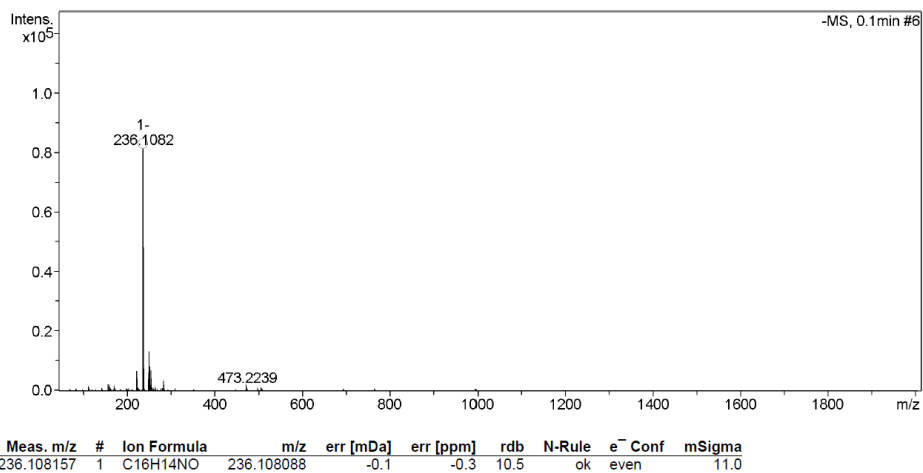

**Fig. S14.** HRMS ESI<sup>-</sup> of (8).

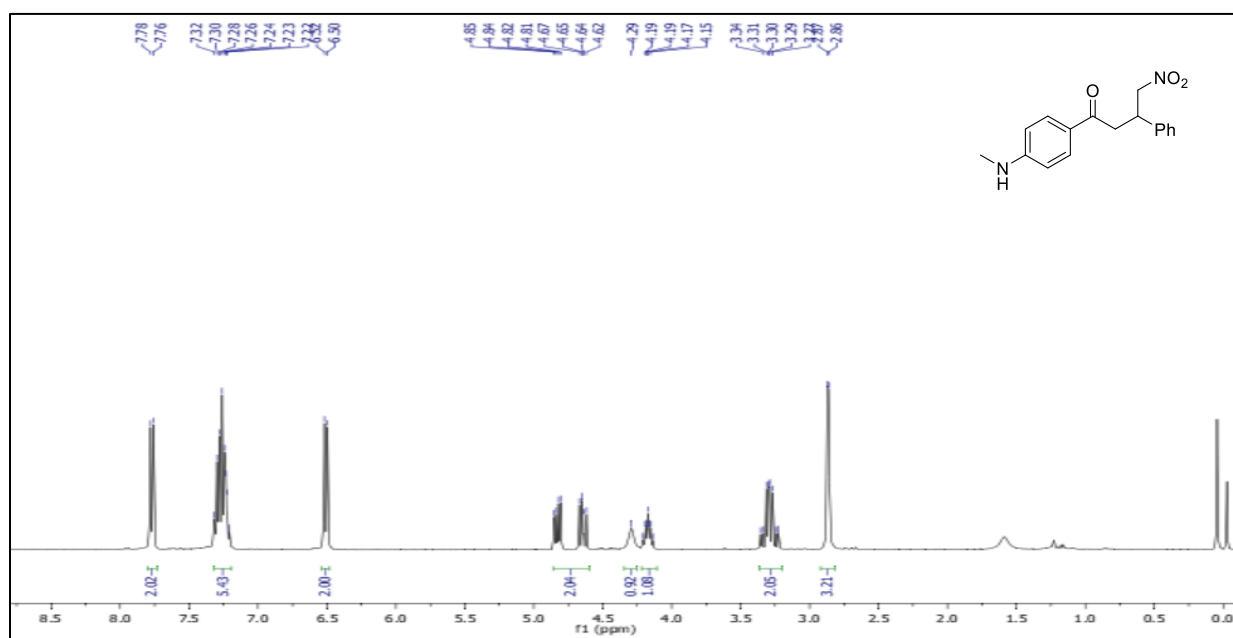

**Fig. S15.** <sup>1</sup>H NMR (CDCl<sub>3</sub>) spectrum for (9).

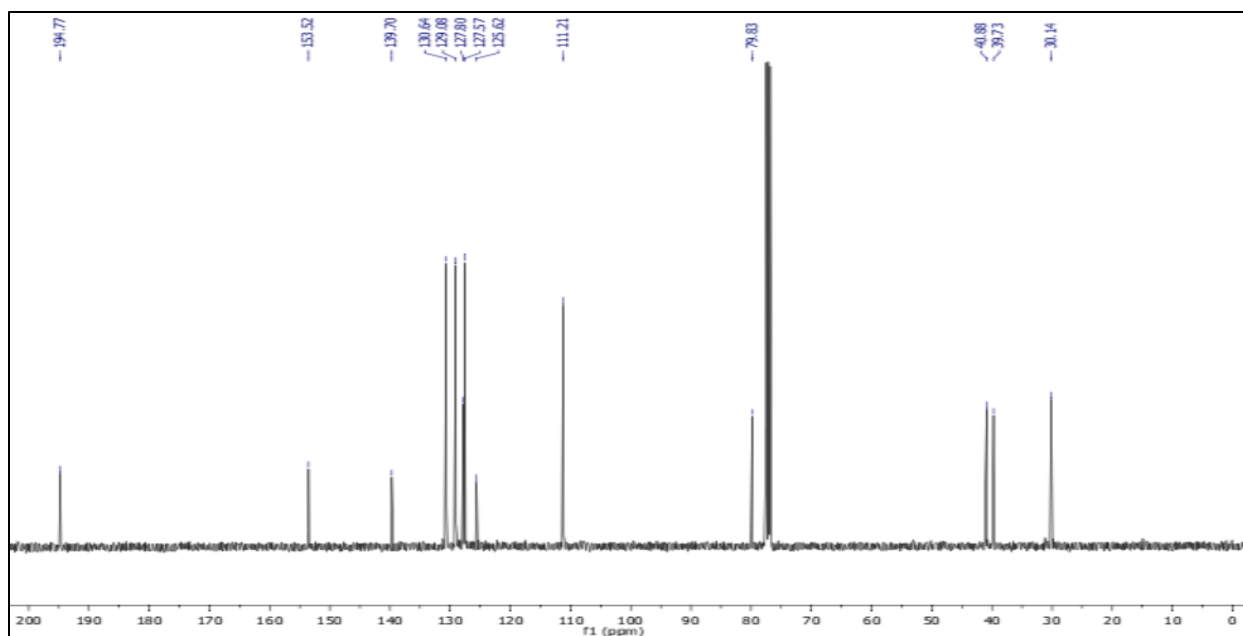

**Fig. S16.**  $^{13}\text{C}$  NMR ( $\text{CDCl}_3$ ) spectrum for (9).

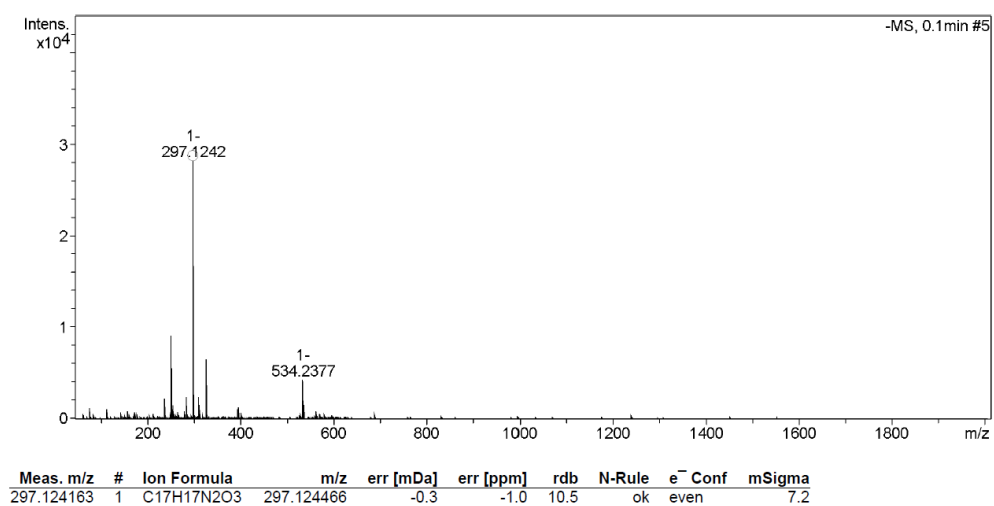

**Fig. S17.** HRMS ESI<sup>-</sup> of (9).

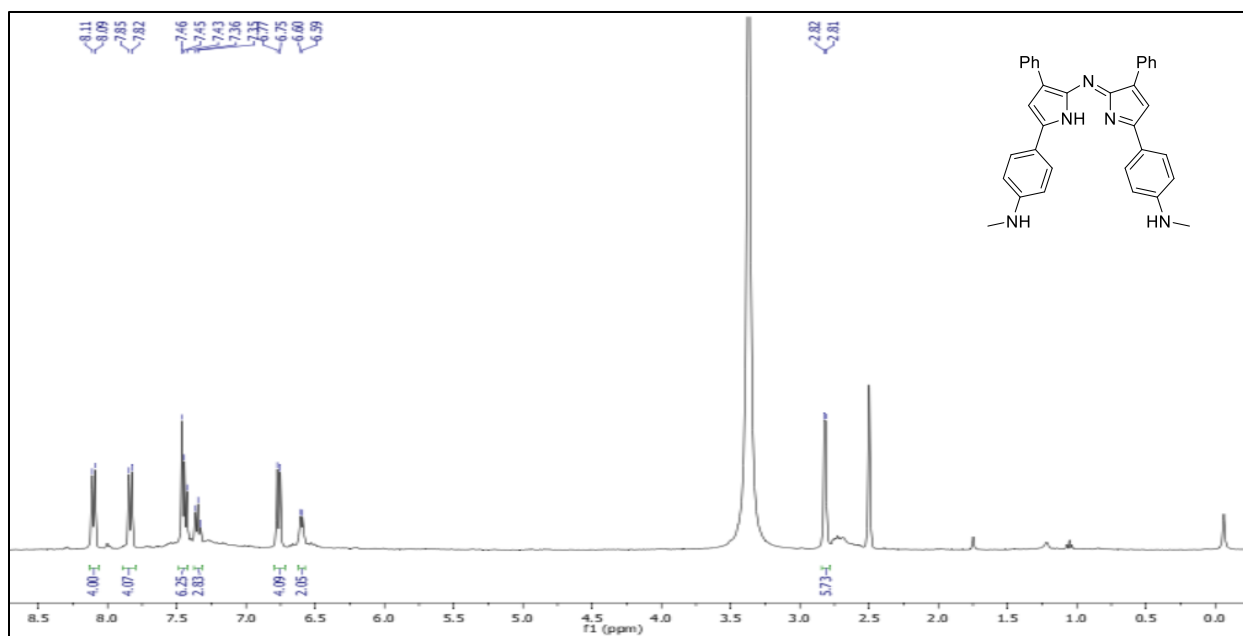

**Fig. S18.**  $^1\text{H}$  NMR ( $\text{DMSO-}d^6$ ) spectrum for (10).

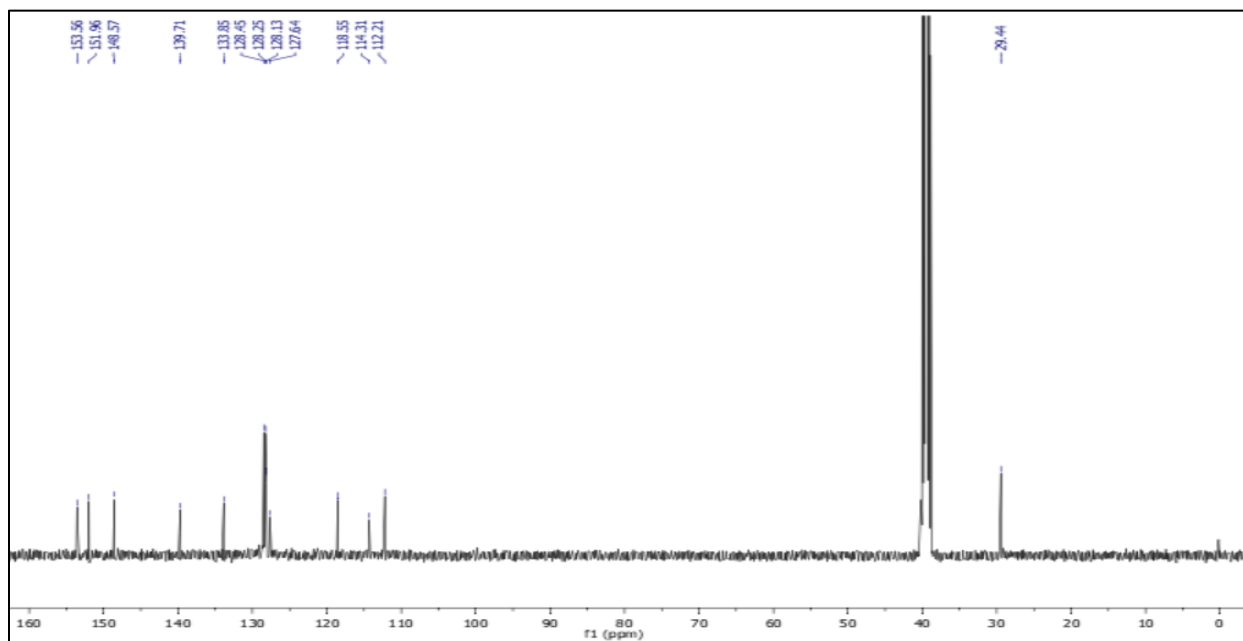

**Fig. S19.**  $^{13}\text{C}$  NMR ( $\text{DMSO-}d^6$ ) spectrum for (10).

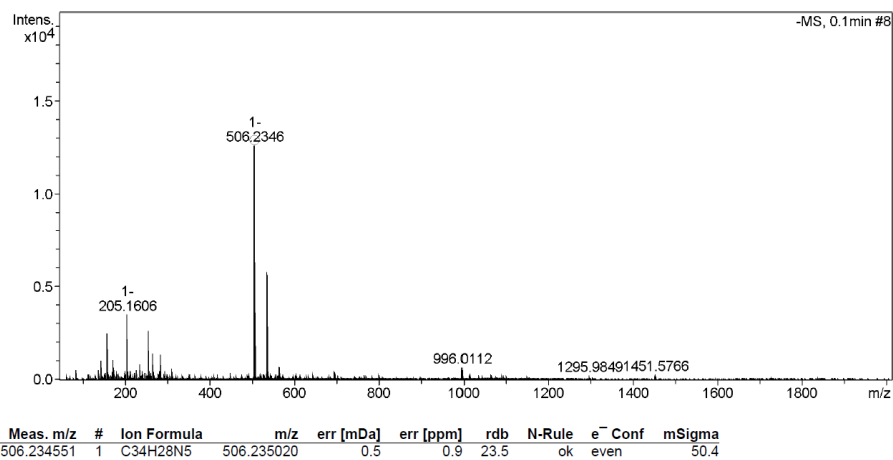

**Fig. S20.** HRMS ESI<sup>-</sup> of (10).

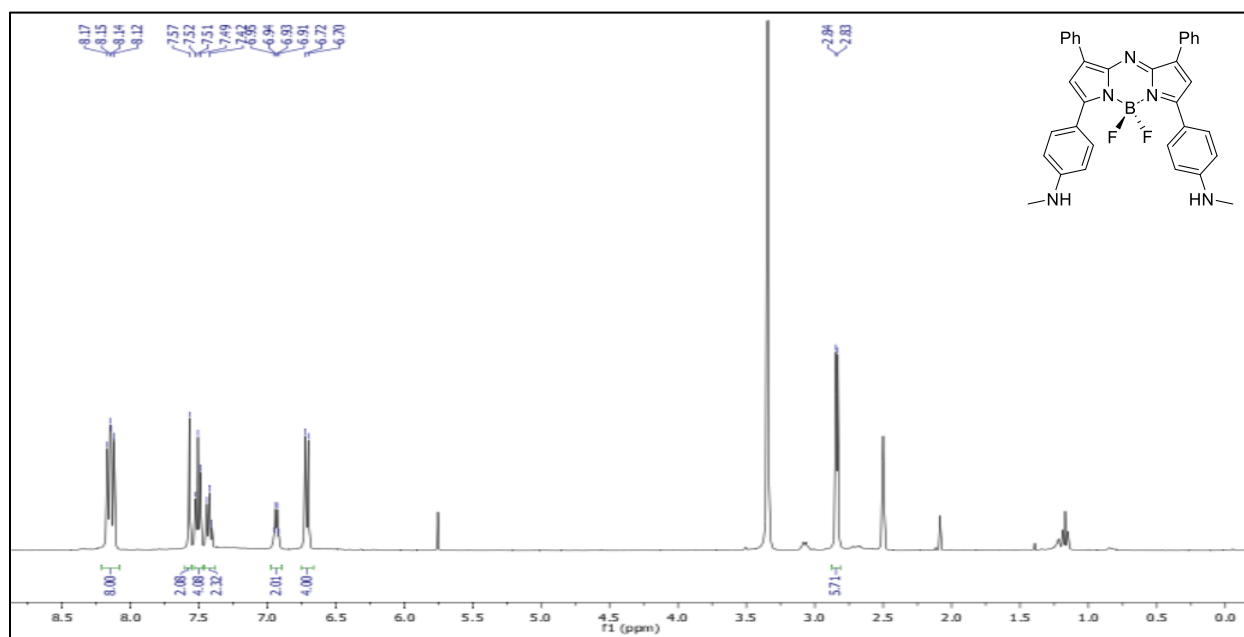

**Fig. S21.** <sup>1</sup>H NMR (DMSO-*d*<sup>6</sup>) spectrum for (11).

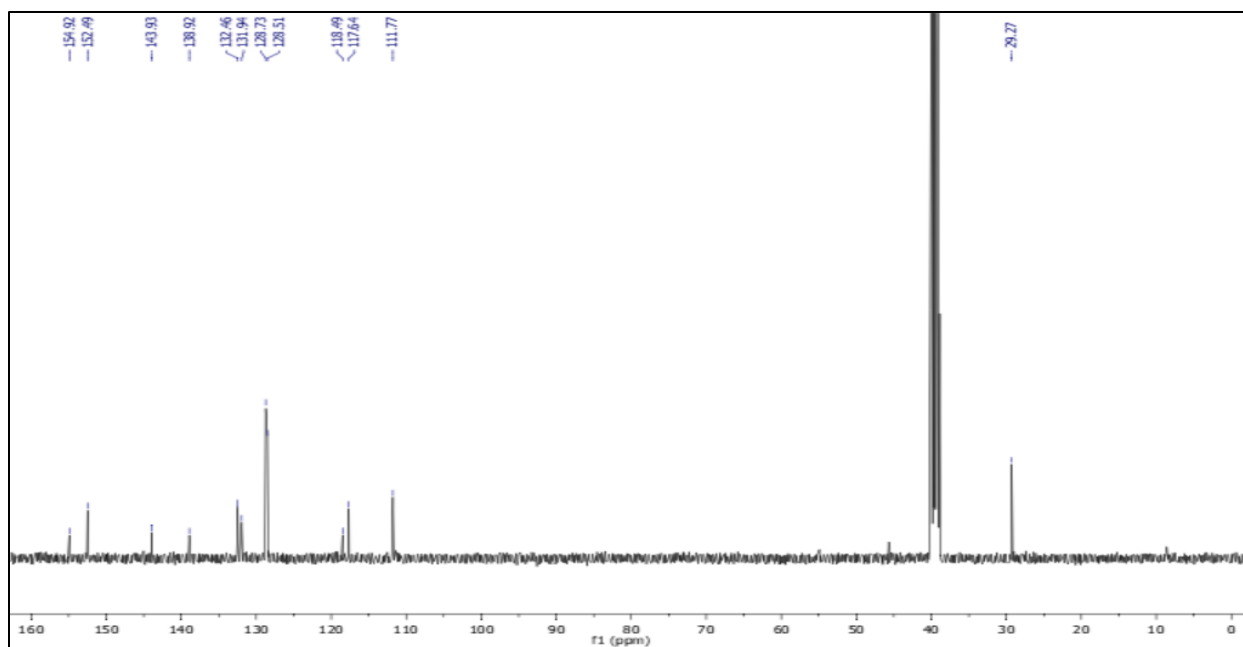

**Fig. S22.**  $^{13}\text{C}$  NMR ( $\text{DMSO-}d^6$ ) spectrum for **(11)**.

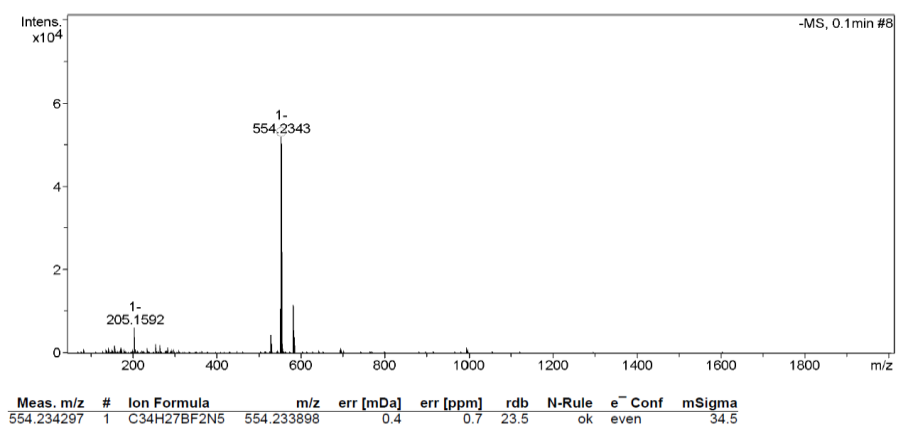

**Fig. S23.** HRMS ESI<sup>-</sup> of **(11)**.

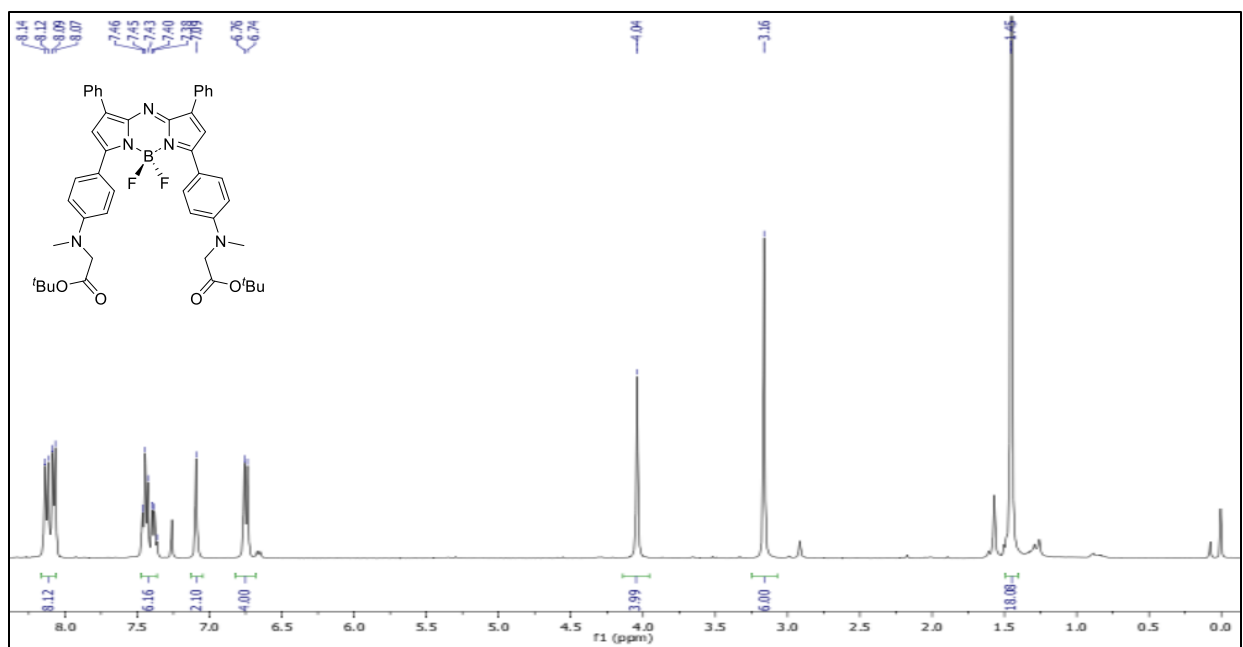

**Fig. S24.**  $^1\text{H}$  NMR ( $\text{CDCl}_3$ ) spectrum for (5).

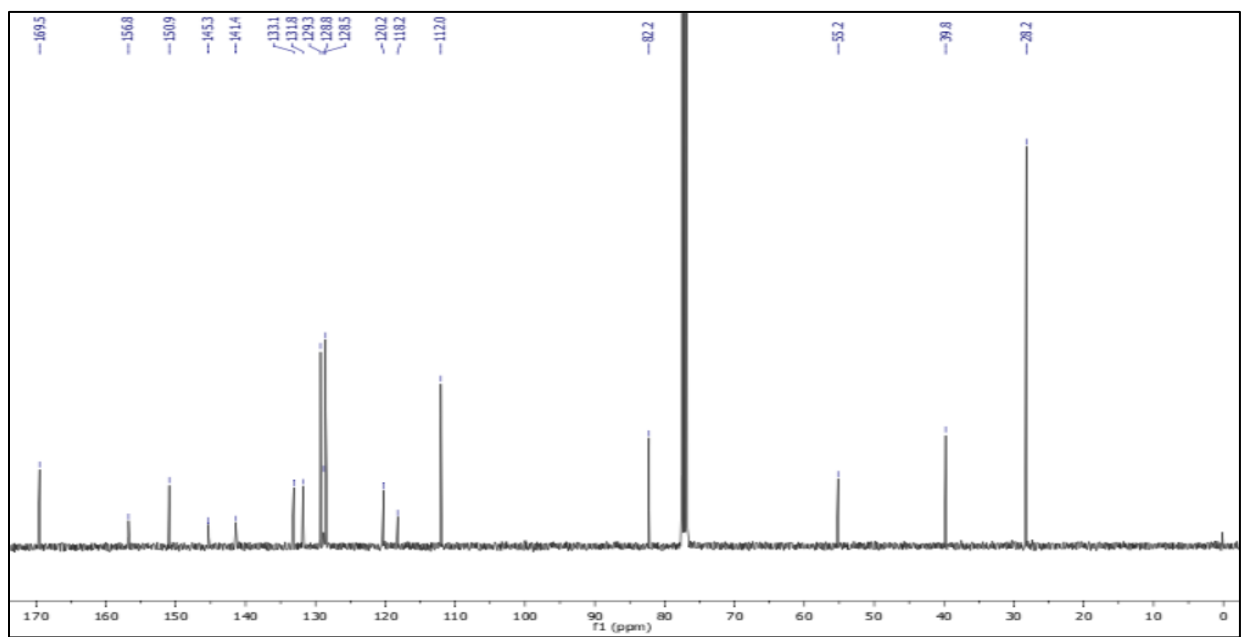

**Fig. S25.**  $^{13}\text{C}$  NMR ( $\text{CDCl}_3$ ) spectrum for (5).

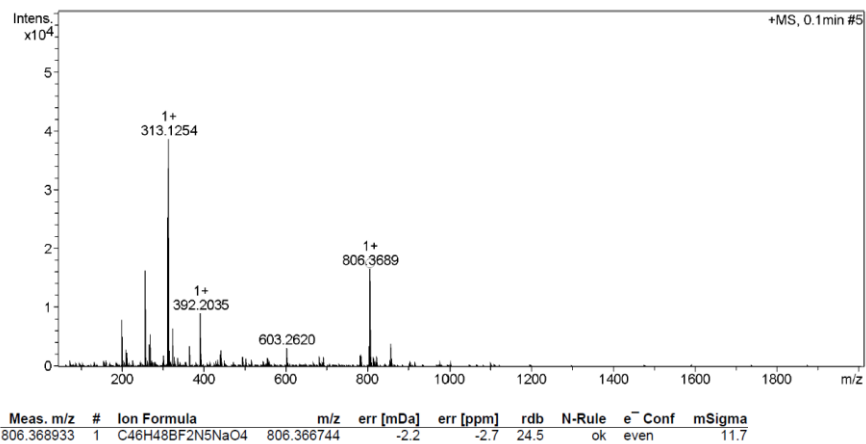

**Fig. S26.** HRMS ESI<sup>+</sup> of (5).

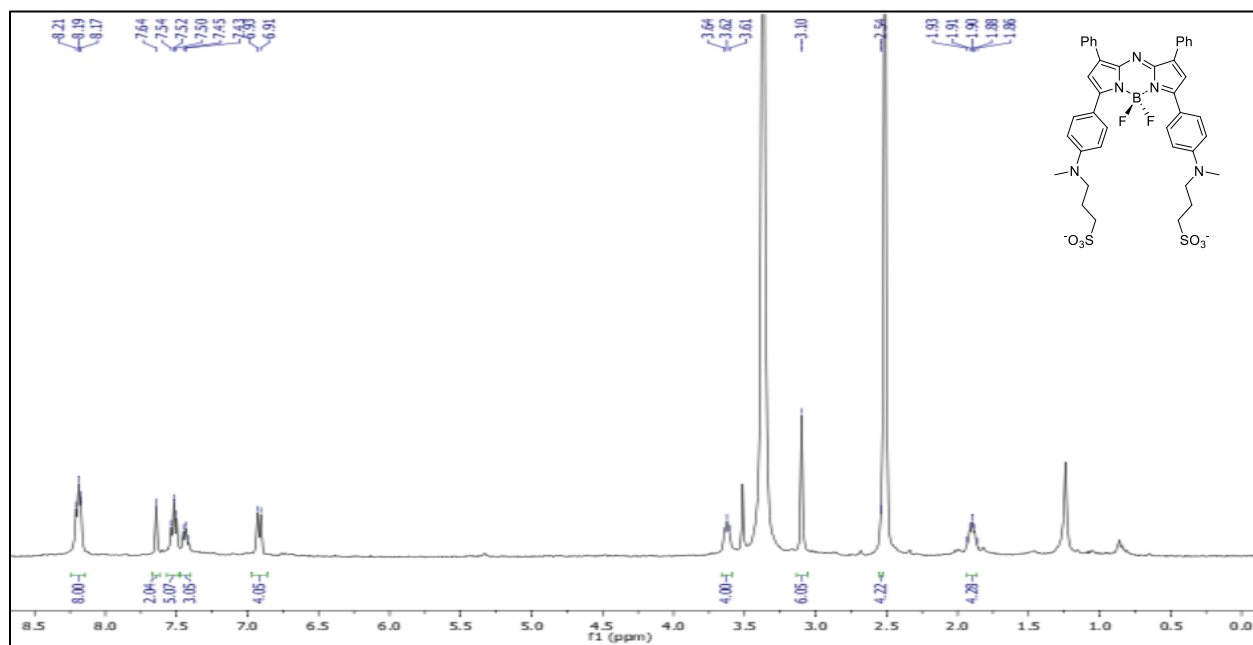

**Fig. S27.** <sup>1</sup>H NMR (DMSO-*d*<sup>6</sup>) spectrum for (6).



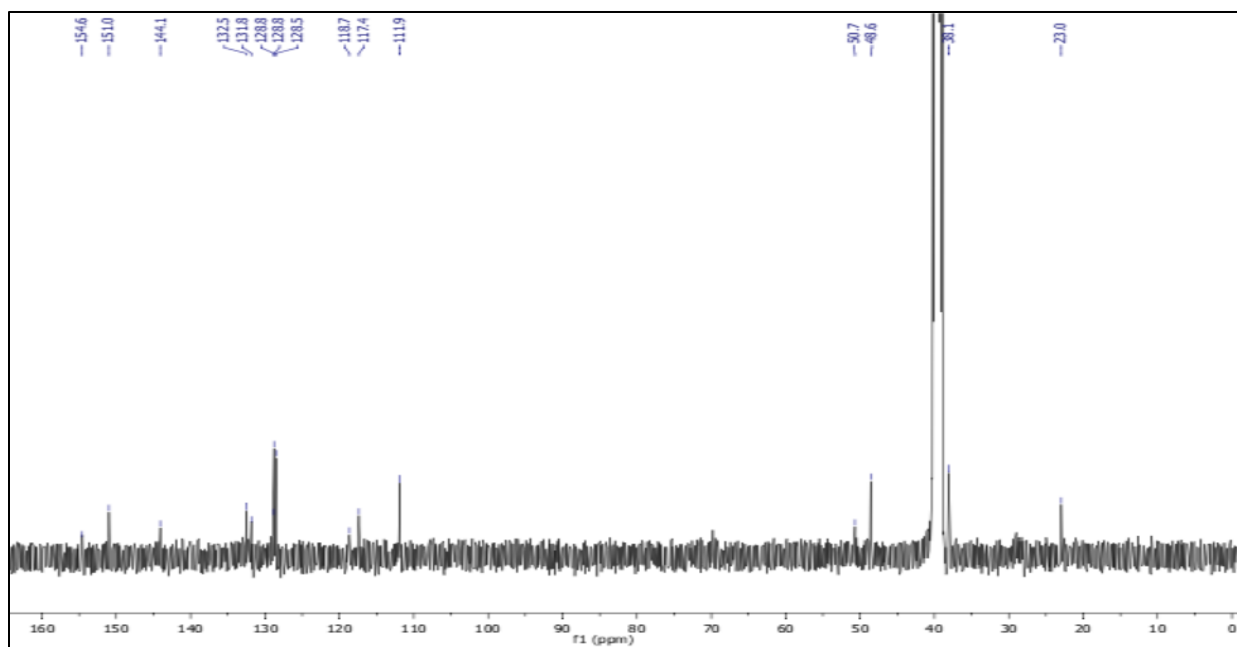

**Fig. S28.**  $^{13}\text{C}$  NMR ( $\text{DMSO-}d^6$ ) spectrum for **(6)**.

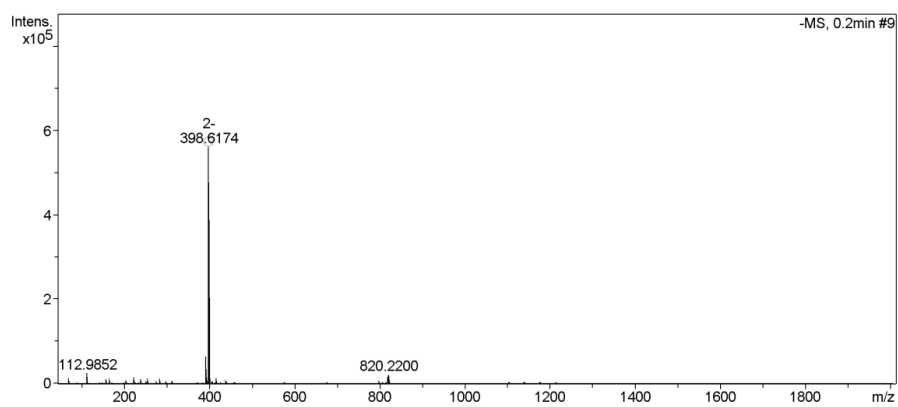

| Meas. m/z  | # | Ion Formula     | m/z        | err [mDa] | err [ppm] | rdb  | N-Rule | e <sup>-</sup> Conf | mSigma |
|------------|---|-----------------|------------|-----------|-----------|------|--------|---------------------|--------|
| 398.617366 | 1 | C40H38BF2N5O6S2 | 398.617129 | -0.2      | -0.6      | 24.0 | ok     | even                | 2.6    |

**Fig. S29.** HRMS ESI<sup>2-</sup> of **(6)**.

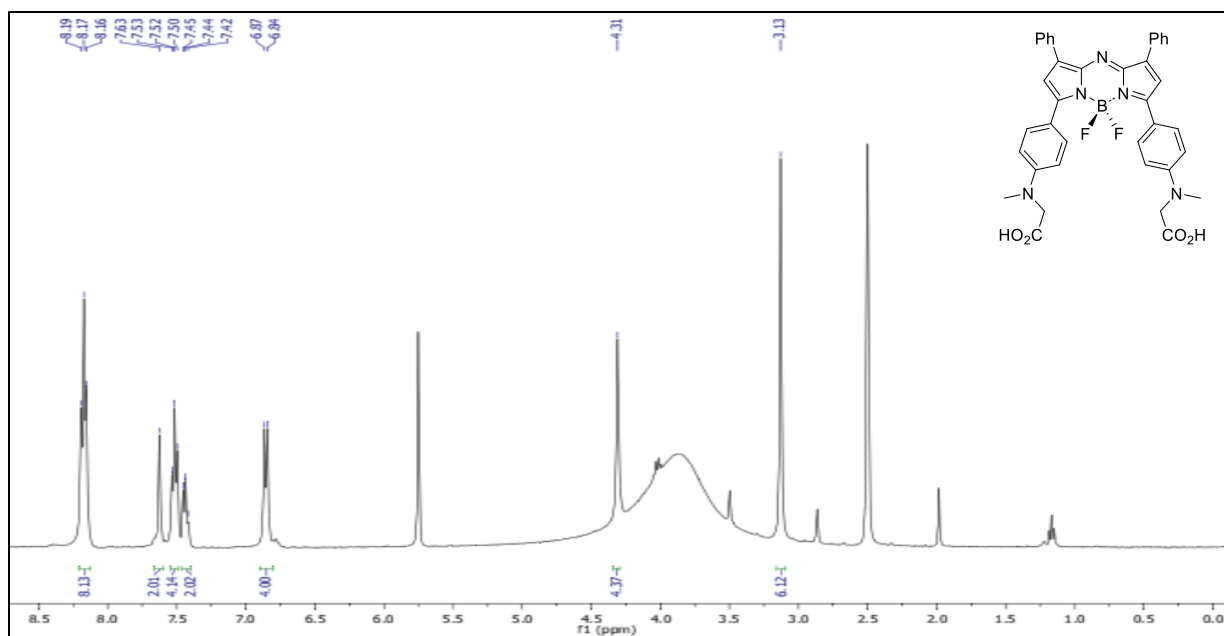

**Fig. S30.**  $^1\text{H}$  NMR ( $\text{DMSO-}d^6$ ) spectrum for (12).

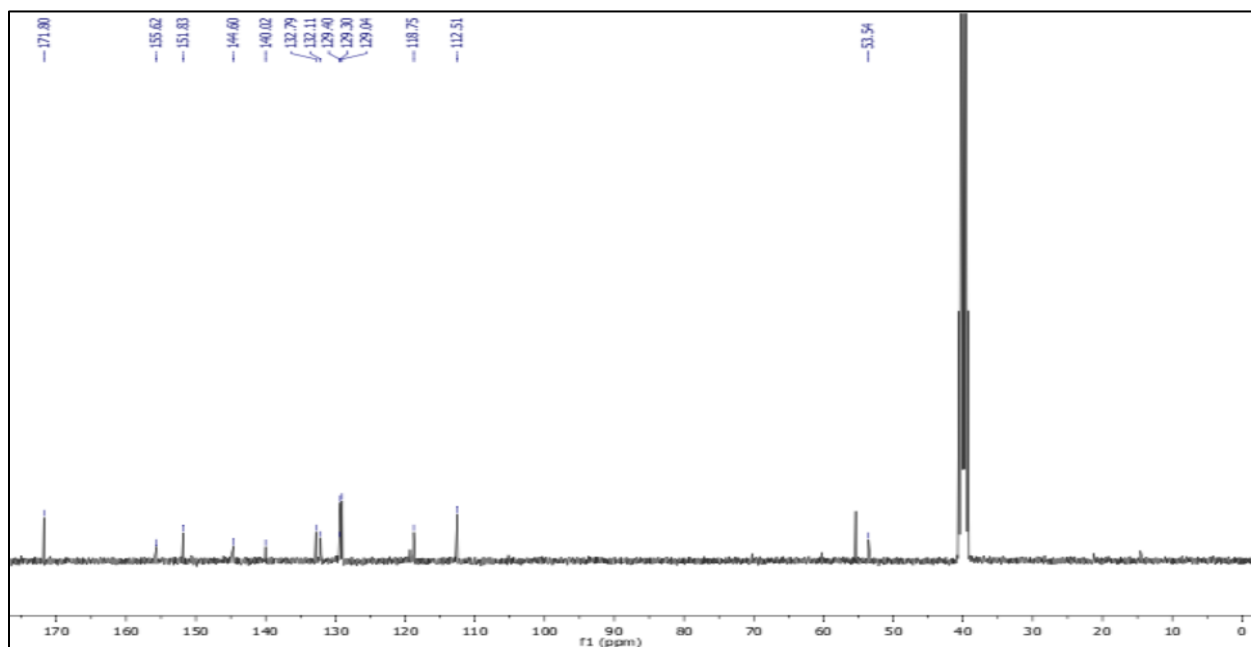

**Fig. S31.**  $^{13}\text{C}$  NMR ( $\text{DMSO-}d^6$ ) spectrum for (12).

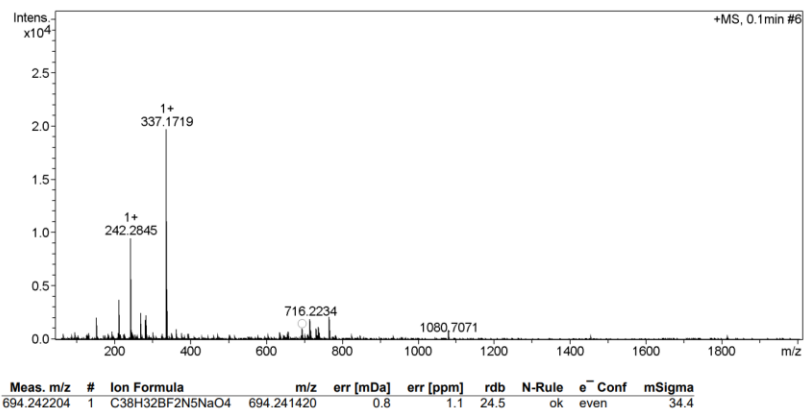

**Fig. S32.** HRMS ESI<sup>+</sup> of (12).

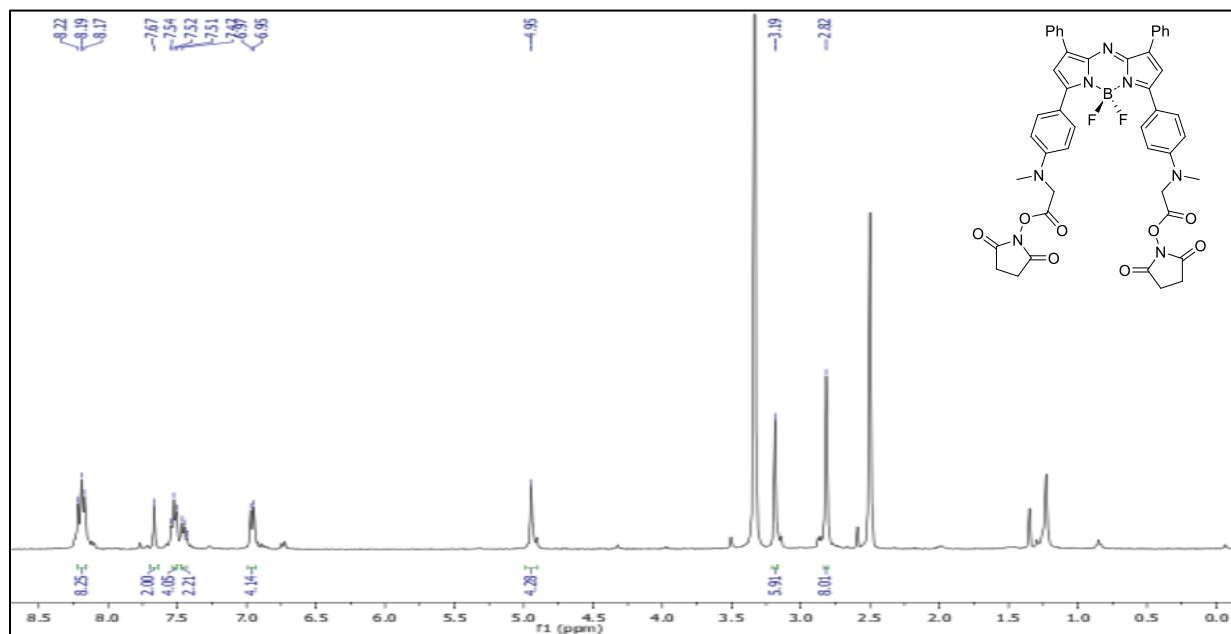

**Fig. S33.** <sup>1</sup>H NMR (DMSO-*d*<sup>6</sup>) spectrum for (13).

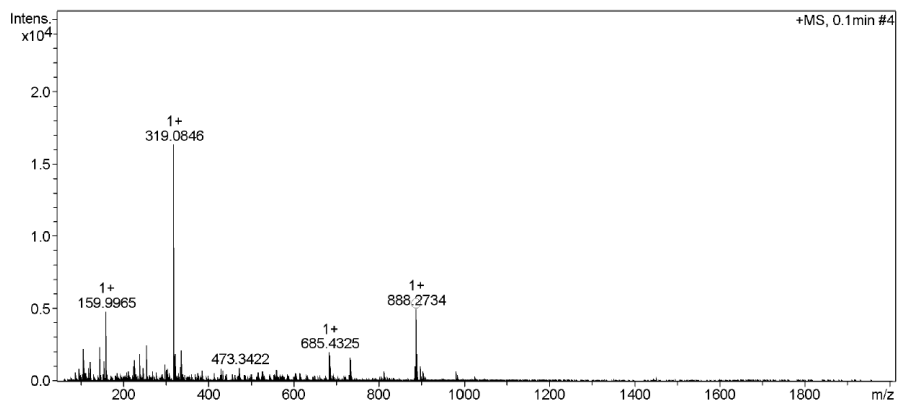

| Meas. m/z  | # | Ion Formula                                                                     | m/z        | err [mDa] | err [ppm] | rdb  | N-Rule | e <sup>-</sup> Conf | mSigma |
|------------|---|---------------------------------------------------------------------------------|------------|-----------|-----------|------|--------|---------------------|--------|
| 888.273364 | 1 | C <sub>46</sub> H <sub>38</sub> BF <sub>2</sub> N <sub>7</sub> NaO <sub>8</sub> | 888.274300 | 0.9       | 1.1       | 30.5 | ok     | even                | 32.8   |

Fig. S34. HRMS ESI<sup>+</sup> of (13).

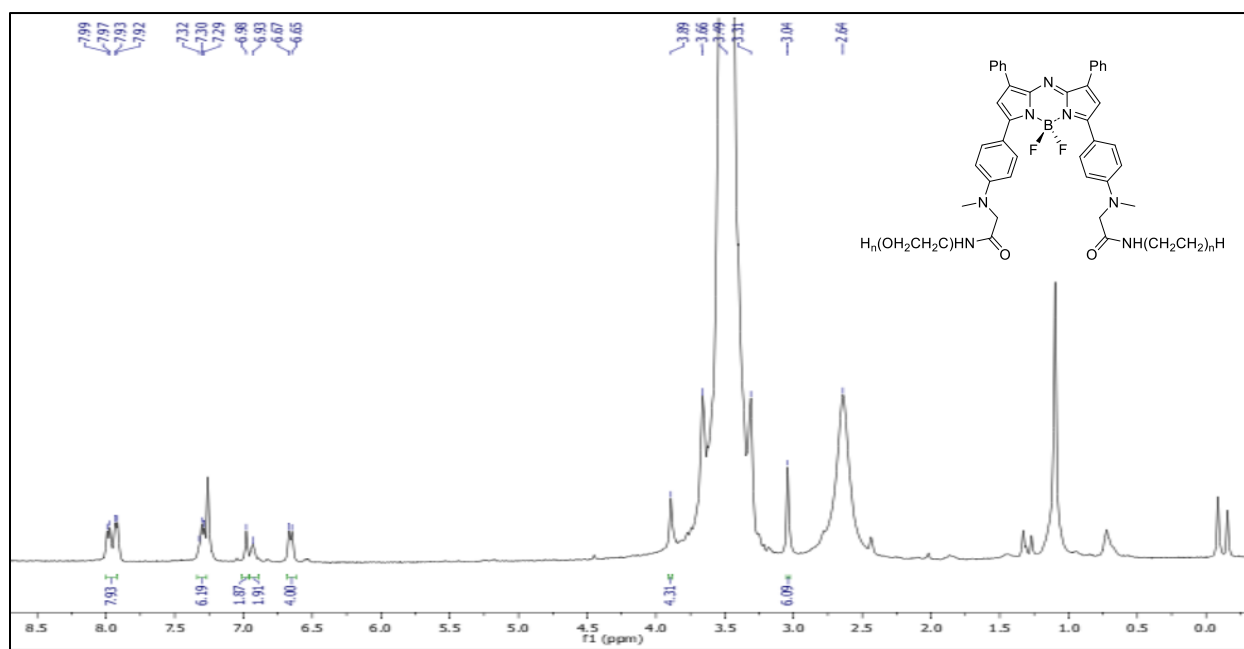

Fig. S35. <sup>1</sup>H NMR (CDCl<sub>3</sub>) spectrum for (7).

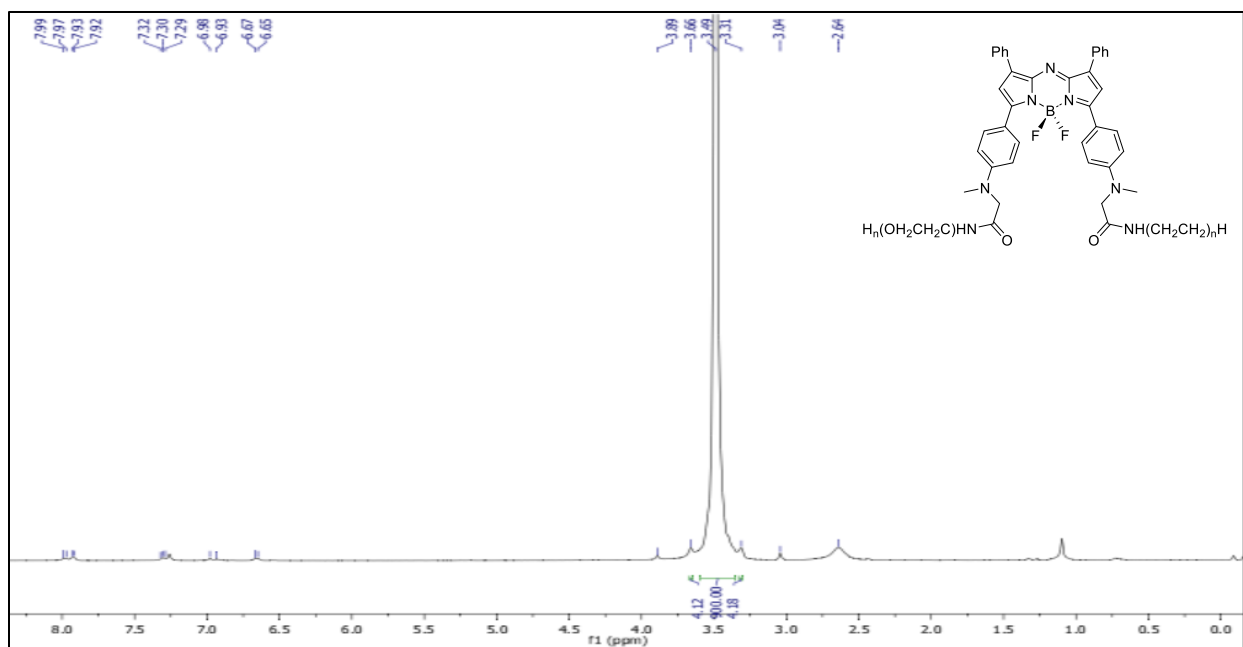

**Fig. S36.**  $^1\text{H}$  NMR ( $\text{CDCl}_3$ ) spectrum for (7).

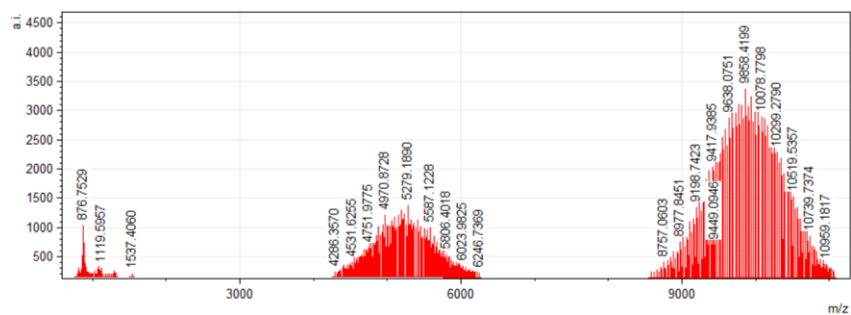

**Fig. S37.** MS MALDI-TOF of (7).

## HPLC traces of 11, 5, 6 and 7.

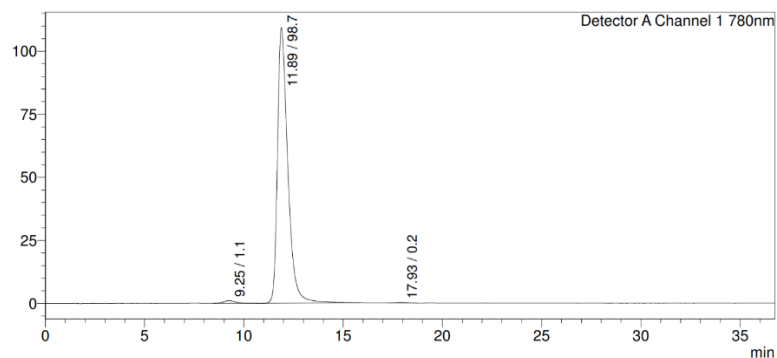

**Fig. S38.** HPLC Trace of **11**.

Conditions: Reverse phase-HPLC with YMC triart phenyl column and size:  $150 \times 4.6$  mm I.D., particle size: S- $5\mu\text{m}$ , 12 nm hole, detection method: UV-Vis and wavelength for detection: 780 nm. Eluent MeCN:H<sub>2</sub>O 70:30 with a flow rate at 1 mL/min.

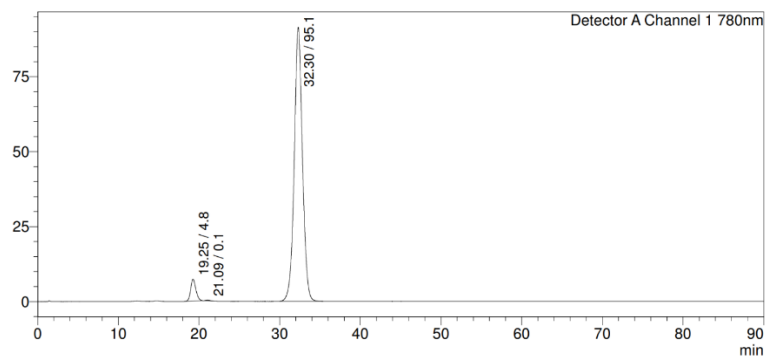

**Fig. S39.** HPLC Trace of **5**. Conditions: As for **11** above. Eluent MeCN:H<sub>2</sub>O 70:30 with a flow rate at 1 mL/min.

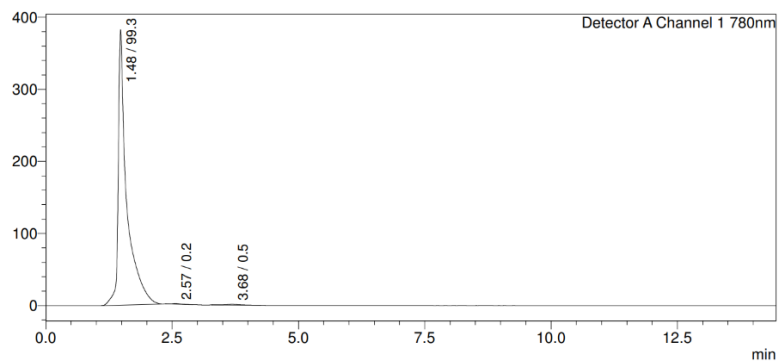

**Fig. S40.** HPLC Trace of **6**. Conditions: Eluent MeCN:H<sub>2</sub>O 45:55 with a flow rate at 1 mL/min.

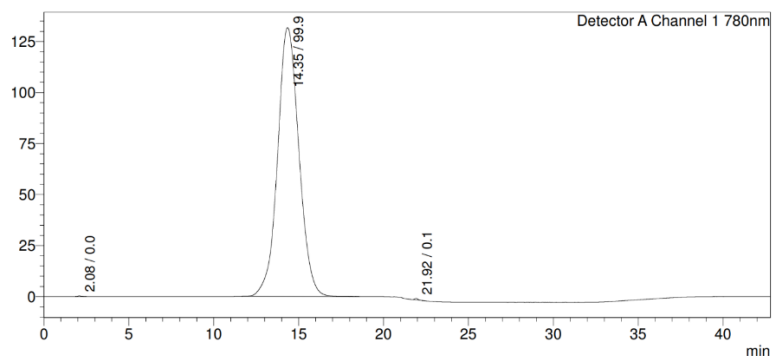

**Fig. S41.** HPLC Trace of **7**. Conditions: Eluent gradient of MeCN:H<sub>2</sub>O 40:60 going to CH<sub>3</sub>CN :H<sub>2</sub>O =70:30 with a flow rate at 1 mL/min.
